# Supplementary material for: Seasonal Adaptation: Geographic Photoperiod–Temperature Patterns Explain Genetic Variation in the Common Vole Tsh Receptor
Source: MDPI journal article supplement (doi:10.3390/genes14020292), 2023-01-22
Supplement: s1 [file s1]

Supplementary Information for

# Seasonal Adaptation: Geographic Photoperiod-Temperature Patterns Explain Genetic Variation in the Common Vole *Tsh* Receptor

Laura van Rosmalen <sup>1,†</sup>, Robin Schepers <sup>1</sup>, Wensi Hao <sup>1</sup>, Anna S. Przybylska-Piech <sup>1,†</sup>, Jeremy S. Herman <sup>2</sup>, Joanna Stojak <sup>3,4</sup>, Jan M. Wójcik <sup>3</sup>, Louis van de Zande <sup>5</sup>, Jeremy B. Searle <sup>6,\*</sup> and Roelof A. Hut <sup>1</sup>

This PDF file includes:

Figures S1 to S3

Tables S1 to S7

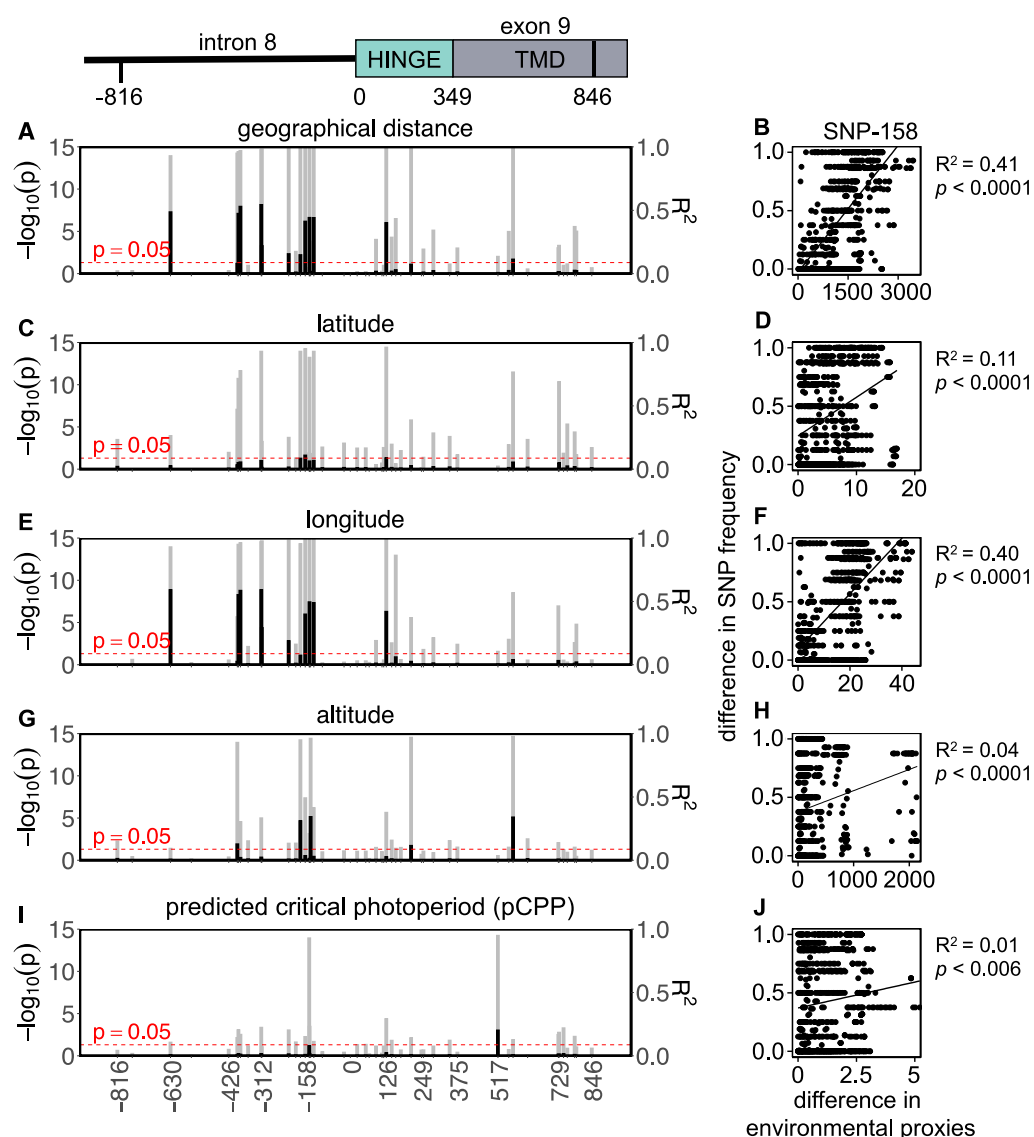

**Figure S1.** *Tshr* mutations in Western and Eastern European common vole populations. Manhattan-type plots ( $-\log_{10}(p)$ ) for the sequenced *Tshr* region for (A) geographical distance, (C) latitude, (E) longitude, (G) altitude and (I) predicted critical photoperiod (pCPP). Grey bars indicate Benjamini-Hochberg adjusted p-values, black bars indicate  $R^2$ -values. SNPs that meet the threshold for

significant correlations ( $p < 0.05$ ) cross the red dashed line. Pairwise difference in SNP frequency for one representative mutations (SNP-158) related to (B) pairwise geographical distance, (D) pairwise latitudinal difference, (F) pairwise longitudinal difference, (H) pairwise altitudinal difference and (J) pairwise difference in pCPP. Significant correlations are indicated by linear regression lines. All statistic results of linear models for SNP frequency related to environmental proxies can be found in Table S5.

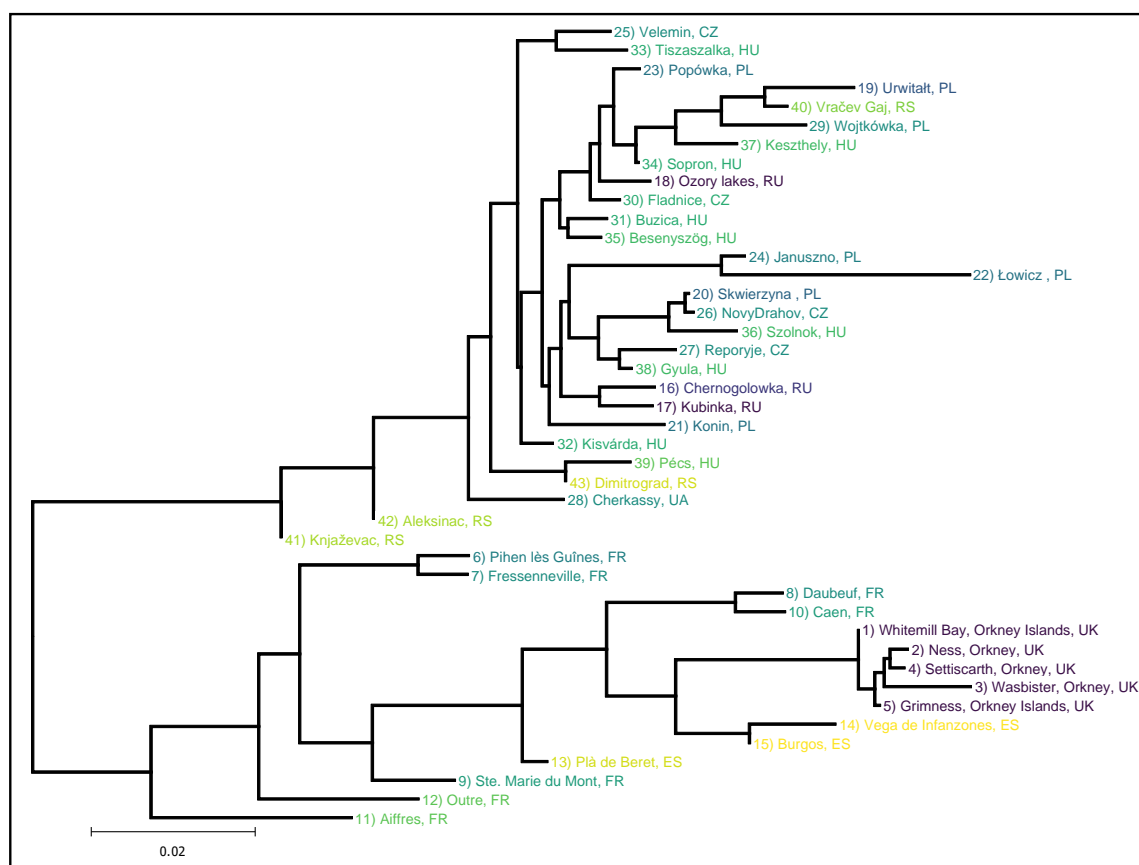

**Figure S2.** A distance-based phylogenetic tree for the sequenced Tshr region, inferred with the neighbor-joining method. Populations are labelled using region names (see Fig. 1 and Table S1). Colors indicate latitude as in Figure 1A, ranging from 42°N (yellow) to 59°N (purple).

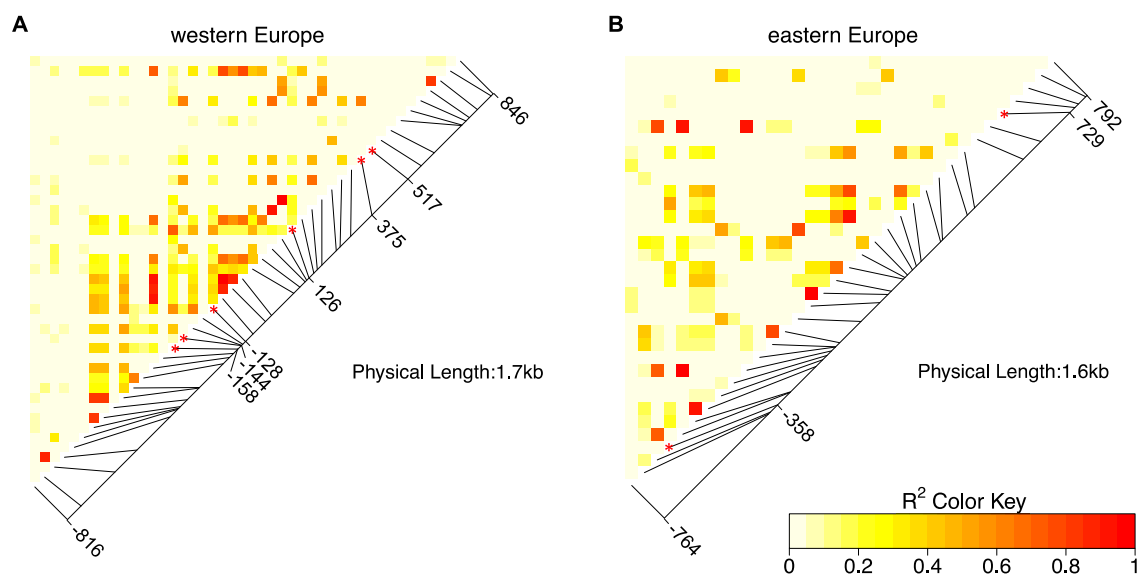

**Figure S3.** Pairwise linkage disequilibrium heatmaps. Patterns of linkage disequilibrium between SNPs within the sequenced Tshr region for (A) Western and (B) Eastern European samples. Colors indicate  $R^2$ -values for pairwise correlations, varying between 0 (white) and 1 (red). Mutations with SNP frequencies that significantly correlate with local temperature thresholds are marked with red asterisks.

**Table S1.** List of locations where *M. arvalis* specimens were obtained (country codes: CZ - Czech Republic, ES - Spain, FR - France, HU - Hungary, PL - Poland, RS - Serbia, RU - Russia, UA - Ukraine, UK - Great Britain), pCPP – predicted critical photoperiod.

| Map reference (Fig1A) | Location                          | Year | Latitude | Longitude | Altitude (m) | n  | pCPP (h) | tissue | Provided by              |
|-----------------------|-----------------------------------|------|----------|-----------|--------------|----|----------|--------|--------------------------|
| 1                     | Whitemill Bay, Orkney Islands, UK | 2006 | 59.30    | -2.55     | 3            | 11 | 15.03    | toe    | J.B. Searle, J.S. Herman |
| 2                     | Ness, Orkney Islands, UK          | 2006 | 59.23    | -2.87     | -1           | 11 | 15.03    | toe    | J.B. Searle, J.S. Herman |
| 3                     | Wasbister, Orkney Islands, UK     | 2006 | 59.18    | -3.06     | 20           | 9  | 15.03    | toe    | J.B. Searle, J.S. Herman |
| 4                     | Settiscarth, Orkney Islands, UK   | 2006 | 59.05    | -3.12     | 104          | 11 | 15.03    | toe    | J.B. Searle, J.S. Herman |
| 5                     | Grimness, Orkney Islands, UK      | 2006 | 58.82    | -2.92     | 75           | 11 | 15.03    | toe    | J.B. Searle, J.S. Herman |
| 6                     | Pihen lès Guînes, FR              | 2007 | 50.87    | 1.79      | 51           | 21 | 12.33    | toe    | J.B. Searle, J.S. Herman |
| 7                     | Fressenneville, FR                | 2007 | 50.07    | 1.58      | 98           | 12 | 12.48    | toe    | J.B. Searle, J.S. Herman |
| 8                     | Daubeuf, FR                       | 2007 | 49.78    | 0.07      | 103          | 12 | 12.19    | toe    | J.B. Searle, J.S. Herman |
| 9                     | Ste. Marie du Mont, FR            | 2007 | 49.37    | -1.23     | 138          | 11 | 12.59    | toe    | J.B. Searle, J.S. Herman |
| 10                    | Caen, FR                          | 2007 | 49.26    | -0.45     | 67           | 12 | 12.28    | toe    | J.B. Searle, J.S. Herman |
| 11                    | Aiffres, FR                       | 2002 | 46.27    | -0.41     | 10           | 11 | 10.19    | toe    | J.B. Searle, J.S. Herman |
| 12                    | Outre, FR                         | 2005 | 46.08    | 3.17      | 330          | 12 | 12.40    | toe    | J.B. Searle, J.S. Herman |
| 13                    | Plà de Beret, ES                  | 2001 | 42.72    | 0.84      | 2146         | 7  | 13.50    | ear    | J.B. Searle, J.S. Herman |

|    |                        |      |       |       |     |    |       |        |                             |
|----|------------------------|------|-------|-------|-----|----|-------|--------|-----------------------------|
| 14 | Vega de Infanzones, ES | 2007 | 42.48 | -5.65 | 914 | 7  | 13.21 | toe    | J.B. Searle,<br>J.S. Herman |
| 15 | Burgos, ES             | 2007 | 42.36 | -3.70 | 891 | 11 | 13.03 | toe    | J.B. Searle,<br>J.S. Herman |
| 16 | Czernogolowka, RU      | 2014 | 56.01 | 38.39 | 160 | 4  | 15.40 | leg    | J. Stojak, J.M.<br>Wójcik   |
| 17 | Kubinka, RU            | 2014 | 55.28 | 36.40 | 200 | 3  | 15.21 | leg    | J. Stojak, J.M.<br>Wójcik   |
| 18 | Ozory Lakes, RU        | 2014 | 54.51 | 38.33 | 200 | 4  | 15.12 | leg    | J. Stojak, J.M.<br>Wójcik   |
| 19 | Urwitałt, PL           | 2014 | 53.81 | 21.64 | 111 | 4  | 14.30 | leg    | J. Stojak, J.M.<br>Wójcik   |
| 20 | Skwierzyna, PL         | 2014 | 52.60 | 15.51 | 28  | 4  | 13.43 | leg    | J. Stojak, J.M.<br>Wójcik   |
| 21 | Konin, PL              | 2014 | 52.22 | 18.25 | 104 | 4  | 13.91 | leg    | J. Stojak, J.M.<br>Wójcik   |
| 22 | Łowicz, PL             | 2014 | 52.06 | 19.56 | 80  | 3  | 13.97 | leg    | J. Stojak, J.M.<br>Wójcik   |
| 23 | Popówka, PL            | 2014 | 52.04 | 23.26 | 141 | 3  | 14.10 | leg    | J. Stojak, J.M.<br>Wójcik   |
| 24 | Januszno, PL           | 2014 | 51.29 | 21.30 | 160 | 3  | 13.60 | leg    | J. Stojak, J.M.<br>Wójcik   |
| 25 | Velemin, CZ            | 2011 | 50.32 | 13.58 | 244 | 4  | 13.23 | leg    | J. Stojak, J.M.<br>Wójcik   |
| 26 | NovyDrahov, CZ         | 2011 | 50.14 | 12.39 | 440 | 4  | 14.17 | leg    | J. Stojak, J.M.<br>Wójcik   |
| 27 | Reporyje, CZ           | 2011 | 50.01 | 14.17 | 412 | 4  | 13.76 | muscle | J. Stojak, J.M.<br>Wójcik   |
| 28 | Cherkassy, UA          | 2012 | 49.87 | 31.43 | 177 | 2  | 13.71 | leg    | J. Stojak, J.M.<br>Wójcik   |
| 29 | Wojtkówka, PL          | 2014 | 49.56 | 22.56 | 420 | 4  | 13.38 | leg    | J. Stojak, J.M.<br>Wójcik   |
| 30 | Fladnice, CZ           | 2011 | 48.48 | 15.59 | 360 | 5  | 12.97 | leg    | J. Stojak, J.M.<br>Wójcik   |
| 31 | Buzica, HU             | 2013 | 48.32 | 21.04 | 216 | 4  | 12.92 | muscle | J. Stojak, J.M.<br>Wójcik   |
| 32 | Kisvárd, HU            | 2013 | 48.22 | 22.08 | 103 | 4  | 12.76 | leg    | J. Stojak, J.M.<br>Wójcik   |
| 33 | Tiszaszalka, HU        | 2013 | 48.19 | 22.31 | 106 | 5  | 12.76 | leg    | J. Stojak, J.M.<br>Wójcik   |
| 34 | Sopron, HU             | 2013 | 47.68 | 16.58 | 217 | 5  | 12.90 | leg    | J. Stojak, J.M.<br>Wójcik   |
| 35 | Besenyszög, HU         | 2013 | 47.30 | 20.26 | 85  | 4  | 12.31 | leg    | J. Stojak, J.M.<br>Wójcik   |
| 36 | Szolnok, HU            | 2013 | 47.16 | 20.18 | 97  | 4  | 12.31 | leg    | J. Stojak, J.M.<br>Wójcik   |
| 37 | Keszthely, HU          | 2013 | 46.77 | 17.25 | 116 | 4  | 12.82 | leg    | J. Stojak, J.M.<br>Wójcik   |
| 38 | Gyula, HU              | 2013 | 46.65 | 21.28 | 87  | 4  | 12.58 | leg    | J. Stojak, J.M.<br>Wójcik   |
| 39 | Pécs, HU               | 2013 | 46.07 | 18.23 | 152 | 4  | 12.49 | leg    | J. Stojak, J.M.<br>Wójcik   |
| 40 | Vračev Gaj, RS         | 2013 | 44.88 | 21.32 | 76  | 4  | 12.39 | leg    | J. Stojak, J.M.<br>Wójcik   |
| 41 | Knjaževac, RS          | 2013 | 43.57 | 22.25 | 220 | 4  | 12.69 | leg    | J. Stojak, J.M.<br>Wójcik   |

|    |                  |      |       |       |     |   |       |        |                        |
|----|------------------|------|-------|-------|-----|---|-------|--------|------------------------|
| 42 | Aleksinac, RS    | 2013 | 43.54 | 21.72 | 271 | 4 | 12.69 | muscle | J. Stojak, J.M. Wójcik |
| 43 | Dimitrovgrad, RS | 2013 | 43.01 | 22.77 | 560 | 4 | 12.77 | leg    | J. Stojak, J.M. Wójcik |

**Table S2.** Primer sequences used for amplification (PCR) and Sanger sequencing of the *Tshr* gene of the common vole.

| Gene                | Forward primer (5'-3') | Reverse primer (5'-3') | Product size (bp) |
|---------------------|------------------------|------------------------|-------------------|
| <i>Tshr</i> intron8 | GGTGGAAAAGATGGCTCGAA   | GGAGCCCCTTAAACTCTGGG   | 1102              |
| <i>Tshr</i> exon9-1 | TTGGAGTGATTCTGACTAGG   | TATCGCGAGGGTTGTACT     | 1208              |

**Table S3.** Thermal cycling conditions for PCR.

| PCR step             | T (°C) | Duration (seconds) | Cycles |
|----------------------|--------|--------------------|--------|
| Initial denaturation | 95     | 120                |        |
| Denaturation         | 95     | 30                 | 35     |
| Annealing            | 60     | 30                 |        |
| Extension            | 72     | 60                 |        |
| Final extension      | 72     | 420                |        |
|                      | 4      | <24h               |        |

**Table S4.** Nucleotide and predicted amino acid sequence of the end of intron 8 and the beginning of exon 9 of the common vole *Tshr*. SNPs shown in red.

[illegible]

**Table S5.** Statistical output for linear models relating pairwise distances of allele frequencies to pairwise difference in environmental proxies (geographical distance, latitude, longitude, altitude and pCPP) in Eastern and Western Europe. SNP loc.: location of SNP relative to intron 8 – exon 9 boundary. SNP: changed nucleotides. Amino acid: changed amino acids are indicated with an asterisk. FST: F-statistic reflecting overall degree of genetic differentiation. pCPP: predicted critical photoperiod. p.adj: Benjamini-Hochberg adjusted p-value. Significant correlations are marked with an asterisk (p<0.05).

| WESTERN AND EASTERN EUROPE |          |     |       |            | geographical distance |                |                    |          |           | latitude       |                    |          |           |                | longitude          |          |           |                |                    | altitude |           |                |                    |          | pCPP      |  |  |  |  |
|----------------------------|----------|-----|-------|------------|-----------------------|----------------|--------------------|----------|-----------|----------------|--------------------|----------|-----------|----------------|--------------------|----------|-----------|----------------|--------------------|----------|-----------|----------------|--------------------|----------|-----------|--|--|--|--|
| #                          | SNP loc. | SNP |       | amino acid | F <sub>ST</sub>       | R <sup>2</sup> | F <sub>1,301</sub> | p        | p.adj     | R <sup>2</sup> | F <sub>1,301</sub> | p        | p.adj     | R <sup>2</sup> | F <sub>1,301</sub> | p        | p.adj     | R <sup>2</sup> | F <sub>1,301</sub> | p        | p.adj     | R <sup>2</sup> | F <sub>1,301</sub> | p        | p.adj     |  |  |  |  |
| -22                        | -816     | A   | G     |            | 0.542                 | 0.00           | 0.77               | 3.79E-01 | 4.65E-01  | 0.02           | 14.81              | 1.31E-04 | 3.05E-04* | 0.00           | 0.07               | 7.93E-01 | 8.27E-01  | 0.01           | 9.67               | 1.96E-03 | 5.32E-03* | 0.00           | 1.85               | 1.75E-01 | 2.20E-01  |  |  |  |  |
| -21                        | -764     | C   | T     |            | 0.242                 | 0.00           | 0.91               | 3.41E-01 | 4.40E-01  | 0.00           | 0.07               | 7.86E-01 | 8.37E-01  | 0.00           | 2.11               | 1.47E-01 | 2.32E-01  | 0.00           | 0.99               | 3.21E-01 | 3.66E-01  | 0.00           | 0.53               | 4.66E-01 | 5.19E-01  |  |  |  |  |
| -20                        | -630     | C   | A/T   |            | 0.944                 | 0.49           | 597.80             | 2.20E-16 | 1.08E-14* | 0.03           | 17.30              | 3.64E-05 | 1.05E-04* | 0.59           | 913.80             | 2.20E-16 | 1.08E-14* | 0.01           | 5.37               | 2.09E-02 | 3.79E-02* | 0.01           | 6.55               | 1.08E-02 | 2.39E-02* |  |  |  |  |
| -19                        | -557     | A   | C     |            | 0.097                 | 0.00           | 0.01               | 9.14E-01 | 9.33E-01  | 0.00           | 0.03               | 8.68E-01 | 8.86E-01  | 0.00           | 0.43               | 5.11E-01 | 5.69E-01  | 0.00           | 0.17               | 6.84E-01 | 6.84E-01  | 0.00           | 0.08               | 7.74E-01 | 8.24E-01  |  |  |  |  |
| -18                        | -426     | T   | C     |            | 0.818                 | 0.00           | 0.88               | 3.48E-01 | 4.37E-01  | 0.01           | 7.42               | 6.57E-03 | 1.01E-02* | 0.00           | 1.71               | 1.91E-01 | 2.76E-01  | 0.00           | 0.81               | 3.68E-01 | 4.10E-01  | 0.00           | 2.47               | 1.16E-01 | 1.67E-01  |  |  |  |  |
| -17                        | -396     | C   | A     |            | 0.082                 | 0.08           | 79.01              | 2.20E-16 | 5.39E-15* | 0.03           | 32.28              | 1.80E-08 | 8.04E-08* | 0.03           | 25.18              | 6.28E-07 | 2.05E-06* | 0.13           | 134.10             | 2.20E-16 | 1.08E-14* | 0.01           | 9.68               | 1.92E-03 | 6.73E-03* |  |  |  |  |
| -16                        | -392     | C   | A     |            | 0.646                 | 0.48           | 818.50             | 2.20E-16 | 3.59E-15* | 0.05           | 49.91              | 3.21E-12 | 1.75E-11* | 0.55           | 1121.00            | 2.20E-16 | 5.39E-15* | 0.01           | 11.39              | 7.70E-04 | 2.69E-03* | 0.02           | 14.95              | 1.18E-04 | 8.29E-04* |  |  |  |  |
| -15                        | -385     | T   | A     |            | 0.766                 | 0.53           | 1022.00            | 2.20E-16 | 2.70E-15* | 0.06           | 54.81              | 3.05E-13 | 2.14E-12* | 0.59           | 1281.00            | 2.20E-16 | 3.59E-15* | 0.02           | 20.97              | 5.33E-06 | 2.61E-05* | 0.01           | 11.90              | 5.88E-04 | 2.88E-03* |  |  |  |  |
| -14                        | -358     | G   | T     |            | 0.503                 | 0.00           | 3.38               | 6.64E-02 | 1.02E-01  | 0.00           | 0.02               | 8.98E-01 | 8.98E-01  | 0.01           | 8.57               | 3.50E-03 | 6.86E-03* | 0.01           | 9.99               | 1.63E-03 | 4.98E-03* | 0.00           | 4.39               | 3.64E-02 | 6.85E-02  |  |  |  |  |
| -13                        | -312     | A   | G     |            | 0.782                 | 0.54           | 1078.00            | 2.20E-16 | 2.16E-15* | 0.07           | 66.57              | 1.13E-15 | 1.11E-14* | 0.59           | 1307.00            | 2.20E-16 | 2.70E-15* | 0.03           | 23.18              | 1.73E-06 | 9.40E-06* | 0.02           | 16.56              | 5.13E-05 | 4.19E-04* |  |  |  |  |
| -12                        | -310     | A   | G     |            | 0.621                 | 0.22           | 255.50             | 2.20E-16 | 1.80E-15* | 0.01           | 13.65              | 2.34E-04 | 5.21E-04* | 0.29           | 374.10             | 2.20E-16 | 2.16E-15* | 0.00           | 0.42               | 5.19E-01 | 5.52E-01  | 0.00           | 3.81               | 5.13E-02 | 8.38E-02  |  |  |  |  |
| -11                        | -216     | G   | A     |            | 0.648                 | 0.16           | 167.60             | 2.20E-16 | 1.54E-15* | 0.02           | 16.05              | 6.66E-05 | 1.72E-04* | 0.19           | 210.90             | 2.20E-16 | 1.80E-15* | 0.01           | 8.27               | 4.14E-03 | 9.65E-03* | 0.02           | 14.66              | 1.38E-04 | 8.43E-04* |  |  |  |  |
| -10                        | -191     | T   | C     |            | 0.385                 | 0.01           | 10.36              | 1.44E-01 | 2.34E-03* | 0.01           | 4.33               | 3.79E-02 | 4.76E-02* | 0.01           | 9.81               | 1.80E-03 | 3.68E-03* | 0.01           | 8.46               | 3.74E-03 | 9.15E-03* | 0.01           | 6.83               | 9.11E-03 | 2.23E-02* |  |  |  |  |
| -9                         | -175     | A   | T     |            | 0.306                 | 0.15           | 143.60             | 2.20E-16 | 1.35E-15* | 0.09           | 77.58              | 2.20E-16 | 1.08E-14* | 0.08           | 66.95              | 1.06E-15 | 4.74E-15* | 0.31           | 372.20             | 2.20E-16 | 5.39E-15* | 0.00           | 0.08               | 7.75E-01 | 8.08E-01  |  |  |  |  |
| -8                         | -158     | G   | C     |            | 0.644                 | 0.41           | 637.10             | 2.20E-16 | 1.20E-15* | 0.11           | 112.90             | 2.20E-16 | 5.39E-15* | 0.40           | 601.70             | 2.20E-16 | 1.54E-15* | 0.04           | 34.90              | 4.92E-09 | 4.02E-08* | 0.01           | 10.45              | 1.27E-03 | 5.19E-03* |  |  |  |  |
| -7                         | -144     | G   | C     |            | 0.225                 | 0.00           | 2.14               | 1.44E-01 | 2.01E-01  | 0.01           | 7.10               | 7.84E-03 | 1.16E-02* | 0.00           | 1.19               | 2.76E-01 | 3.56E-01  | 0.00           | 0.26               | 6.12E-01 | 6.24E-01  | 0.08           | 79.79              | 2.20E-16 | 1.08E-14* |  |  |  |  |
| -6                         | -143     | T   | C     |            | 0.655                 | 0.44           | 717.50             | 2.20E-16 | 1.08E-15* | 0.07           | 62.75              | 6.88E-15 | 5.62E-14* | 0.50           | 889.00             | 2.20E-16 | 1.35E-15* | 0.02           | 14.48              | 1.51E-04 | 6.74E-04* | 0.02           | 17.88              | 2.59E-05 | 3.17E-04* |  |  |  |  |
| -5                         | -139     | G   | C     |            | 0.186                 | 0.02           | 16.14              | 6.36E-05 | 1.42E-04* | 0.01           | 6.52               | 1.08E-02 | 1.51E-02* | 0.00           | 3.97               | 4.68E-02 | 7.90E-02  | 0.35           | 476.20             | 2.20E-16 | 3.59E-15* | 0.00           | 4.01               | 4.56E-02 | 7.71E-02  |  |  |  |  |
| -4                         | -128     | T   | C     |            | 0.670                 | 0.44           | 714.50             | 2.20E-16 | 9.80E-16* | 0.07           | 67.09              | 8.84E-16 | 1.08E-14* | 0.49           | 867.20             | 2.20E-16 | 1.20E-15* | 0.03           | 29.18              | 8.43E-08 | 5.90E-07* | 0.01           | 7.17               | 7.54E-03 | 1.94E-02* |  |  |  |  |
| -3                         | -98      | C   | T     |            | 0.000                 | 0.00           | 0.03               | 8.65E-01 | 9.21E-01  | 0.01           | 10.45              | 1.27E-03 | 2.40E-03* | 0.00           | 0.39               | 5.34E-01 | 5.81E-01  | 0.00           | 3.30               | 6.98E-02 | 9.77E-02  | 0.00           | 1.21               | 2.71E-01 | 3.32E-01  |  |  |  |  |
| -2                         | -46      | A   | C     |            | 0.000                 | 0.01           | 10.41              | 1.30E-03 | 2.36E-03* | 0.02           | 22.80              | 2.09E-06 | 7.33E-06* | 0.00           | 2.22               | 1.37E-01 | 2.23E-01  | 0.01           | 12.30              | 4.75E-04 | 1.94E-03* | 0.01           | 6.62               | 1.03E-02 | 2.39E-02* |  |  |  |  |
| -1                         | -22      | G   | A     |            | 0.000                 | 0.00           | 0.00               | 9.48E-01 | 9.48E-01  | 0.01           | 12.73              | 3.78E-04 | 8.06E-04* | 0.00           | 0.66               | 4.15E-01 | 4.85E-01  | 0.00           | 3.93               | 4.79E-02 | 7.56E-02  | 0.00           | 1.03               | 3.11E-01 | 3.72E-01  |  |  |  |  |
| 1                          | 24       | C   | T     | N          | 0.388                 | 0.00           | 0.43               | 5.11E-01 | 5.97E-01  | 0.01           | 9.76               | 1.85E-03 | 3.12E-03* | 0.00           | 1.15               | 2.83E-01 | 3.56E-01  | 0.00           | 3.61               | 5.77E-02 | 8.57E-02  | 0.01           | 5.29               | 2.17E-02 | 4.62E-02* |  |  |  |  |
| 2                          | 54       | A   | G     | R          | 0.426                 | 0.00           | 0.43               | 5.11E-01 | 5.83E-01  | 0.01           | 9.76               | 1.85E-03 | 3.02E-03* | 0.00           | 1.15               | 2.83E-01 | 3.47E-01  | 0.00           | 3.61               | 5.77E-02 | 8.32E-02  | 0.01           | 5.29               | 2.17E-02 | 4.43E-02* |  |  |  |  |
| 3                          | 66       | T   | C     | N          | 0.212                 | 0.00           | 0.17               | 6.82E-01 | 7.59E-01  | 0.00           | 0.03               | 8.52E-01 | 8.88E-01  | 0.00           | 0.52               | 4.71E-01 | 5.36E-01  | 0.00           | 0.29               | 5.89E-01 | 6.14E-01  | 0.00           | 0.40               | 5.29E-01 | 5.76E-01  |  |  |  |  |
| 4                          | 90       | G   | A     | Q          | 0.000                 | 0.02           | 17.16              | 3.76E-05 | 8.77E-05* | 0.00           | 1.37               | 2.43E-01 | 2.83E-01  | 0.01           | 12.01              | 5.53E-04 | 1.36E-03* | 0.01           | 5.89               | 1.54E-02 | 3.02E-02* | 0.00           | 4.26               | 3.92E-02 | 6.86E-02  |  |  |  |  |
| 5                          | 111      | T   | C     | S          | 0.336                 | 0.00           | 0.56               | 4.53E-01 | 5.42E-01  | 0.00           | 2.06               | 1.52E-01 | 1.86E-01  | 0.00           | 0.27               | 6.04E-01 | 6.43E-01  | 0.00           | 3.26               | 7.14E-02 | 9.71E-02* | 0.00           | 0.64               | 4.25E-01 | 4.84E-01  |  |  |  |  |
| 6                          | 117      | C   | G/T   | G          | 0.000                 | 0.00           | 3.28               | 7.06E-02 | 1.02E-01  | 0.01           | 10.08              | 1.55E-03 | 2.72E-03* | 0.00           | 1.68               | 1.96E-01 | 2.67E-01  | 0.00           | 1.18               | 2.78E-01 | 3.32E-01  | 0.00           | 4.32               | 3.81E-02 | 6.91E-02  |  |  |  |  |
| 7                          | 126      | A   | G     | G          | 0.561                 | 0.40           | 606.10             | 2.20E-16 | 8.98E-16* | 0.09           | 88.26              | 2.20E-16 | 3.59E-15* | 0.42           | 655.50             | 2.20E-16 | 1.08E-15* | 0.03           | 26.37              | 3.46E-07 | 2.12E-06* | 0.02           | 22.50              | 2.45E-06 | 4.00E-05* |  |  |  |  |
| 8                          | 145      | T   | C     | F          | 0.647                 | 0.02           | 18.39              | 2.00E-05 | 4.89E-05* | 0.01           | 12.07              | 5.38E-04 | 1.10E-03* | 0.01           | 10.65              | 1.14E-03 | 2.54E-03* | 0.01           | 10.46              | 1.26E-03 | 4.13E-03* | 0.01           | 7.80               | 5.34E-03 | 1.45E-02* |  |  |  |  |
| 9                          | 159      | G   | A     | S          | 0.637                 | 0.03           | 29.01              | 9.22E-08 | 3.01E-07* | 0.00           | 1.73               | 1.89E-01 | 2.26E-01  | 0.06           | 59.93              | 2.64E-14 | 1.08E-13* | 0.01           | 5.28               | 2.18E-02 | 3.81E-02* | 0.00           | 0.07               | 7.93E-01 | 8.10E-01  |  |  |  |  |
| 10                         | 177      | C   | T     | Y          | 0.174                 | 0.00           | 0.02               | 8.76E-01 | 9.13E-01  | 0.01           | 8.34               | 3.98E-03 | 6.28E-03* | 0.00           | 1.98               | 1.60E-01 | 2.44E-01  | 0.01           | 5.83               | 1.60E-02 | 3.02E-02* | 0.00           | 2.05               | 1.53E-01 | 2.02E-01  |  |  |  |  |
| 11                         | 213      | T   | C     | N          | 0.000                 | 0.07           | 72.74              | 2.20E-16 | 8.29E-16* | 0.03           | 26.3               | 3.57E-07 | 1.46E-06* | 0.03           | 24.59              | 8.47E-07 | 2.60E-06* | 0.12           | 119.60             | 2.20E-16 | 2.70E-15* | 0.01           | 9.39               | 2.24E-03 | 7.32E-03* |  |  |  |  |
| 12                         | 249      | G   | T     | T          | 0.299                 | 0.00           | 0.09               | 7.64E-01 | 8.32E-01  | 0.00           | 0.28               | 5.95E-01 | 6.48E-01  | 0.00           | 0.01               | 9.15E-01 | 9.34E-01  | 0.00           | 2.02               | 1.56E-01 | 1.96E-01  | 0.00           | 1.97               | 1.61E-01 | 2.07E-01  |  |  |  |  |
| 13                         | 256      | G   | A     | A          | 0.962                 | 0.01           | 11.66              | 6.69E-04 | 1.26E-03* | 0.01           | 4.72               | 3.00E-02 | 3.87E-02* | 0.01           | 7.03               | 8.17E-03 | 1.54E-02* | 0.00           | 3.74               | 5.35E-02 | 8.20E-02  | 0.00           | 2.13               | 1.45E-01 | 1.97E-01  |  |  |  |  |
| 14                         | 291      | G   | A/C   | D          | 0.000                 | 0.02           | 22.52              | 2.42E-06 | 6.98E-06* | 0.02           | 18.75              | 1.66E-05 | 5.09E-05* | 0.01           | 13.62              | 2.37E-04 | 6.46E-04* | 0.00           | 2.75               | 9.79E-02 | 1.26E-01  | 0.00           | 4.45               | 3.51E-02 | 6.88E-02  |  |  |  |  |
| 15                         | 348      | C   | T     | D          | 0.445                 | 0.00           | 4.09               | 4.34E-02 | 7.10E-02  | 0.02           | 16.66              | 4.87E-05 | 1.33E-04* | 0.00           | 0.00               | 9.97E-01 | 9.97E-01  | 0.01           | 9.98               | 1.63E-03 | 4.70E-03* | 0.01           | 7.99               | 4.82E-03 | 1.39E-02* |  |  |  |  |
| 16                         | 375      | C   | A     | I          | 0.279                 | 0.01           | 12.32              | 4.72E-04 | 9.24E-04* | 0.01           | 5.93               | 1.51E-02 | 2.00E-02* | 0.01           | 9.83               | 1.77E-03 | 3.77E-03* | 0.01           | 6.22               | 1.28E-02 | 2.73E-02* | 0.00           | 1.01               | 3.15E-01 | 3.67E-01  |  |  |  |  |
| 17                         | 517      | C   | T/G/A | L          | 0.000                 | 0.01           | 7.82               | 5.30E-03 | 8.95E-03* | 0.00           | 0.77               | 3.00E-01 | 4.33E-01  | 0.01           | 6.07               | 1.40E-02 | 2.54E-02* | 0.00           | 1.49               | 2.23E-01 | 2.74E-01  | 0.20           | 219.40             | 2.20E-16 | 5.39E-15* |  |  |  |  |
| 18                         | 555      | G   | A     | S          | 0.502                 | 0.02           | 21.56              | 3.97E-06 | 1.02E-05* | 0.01           | 11.72              |          |           |                |                    |          |           |                |                    |          |           |                |                    |          |           |  |  |  |  |



**Table S6.** Statistical output for linear models relating pairwise distances of allele frequencies to pairwise difference in environmental proxies (geographical distance, latitude, longitude, altitude and pCPP) in Western Europe. SNP loc.: location of SNP relative to intron 8 – exon 9 boundary. SNP: changed nucleotides. Amino acid: changed amino acids are indicated with an asterisk. FST: F-statistic reflecting overall degree of genetic differentiation. pCPP: predicted critical photoperiod. p.adj: Benjamini-Hochberg adjusted p-value. Significant correlations are marked with an asterisk ( $p < 0.05$ ).

| WESTERN EUROPE |          |     |            |   | geographical distance |                |                    |          |           | latitude       |                    |          |           | longitude      |                    |          |           | altitude       |                    |          |           | pCPP           |                    |          |           |           |
|----------------|----------|-----|------------|---|-----------------------|----------------|--------------------|----------|-----------|----------------|--------------------|----------|-----------|----------------|--------------------|----------|-----------|----------------|--------------------|----------|-----------|----------------|--------------------|----------|-----------|-----------|
| #              | SNP loc. | SNP | amino acid |   | F <sub>ST</sub>       | R <sup>2</sup> | F <sub>1,100</sub> | p        | p-adj     | R <sup>2</sup> | F <sub>1,100</sub> | p        | p-adj     | R <sup>2</sup> | F <sub>1,100</sub> | p        | p-adj     | R <sup>2</sup> | F <sub>1,100</sub> | p        | p-adj     | R <sup>2</sup> | F <sub>1,100</sub> | p        | p-adj     |           |
| -22            | -816     | A   | G          |   | 0.695                 | 0.01           | 0.76               | 3.84E-01 | 7.84E-01  | 0.01           | 1.21               | 2.74E-01 | 6.72E-01  | 0.11           | 12.42              | 6.35E-04 | 2.59E-03* | 0.03           | 3.60               | 6.05E-02 | 3.29E-01  | 0.01           | 0.66               | 4.19E-01 | 6.41E-01  |           |
| -21            | -764     | C   | T          |   | 0.460                 | 0.02           | 1.79               | 1.84E-01 | 5.62E-01  | 0.02           | 2.24               | 1.37E-01 | 6.12E-01  | 0.02           | 2.34               | 1.29E-01 | 2.26E-01  | 0.00           | 0.08               | 7.73E-01 | 9.47E-01  | 0.03           | 3.39               | 6.84E-02 | 2.24E-01  |           |
| -20            | -630     | C   | A/T        |   | 0.185                 | 0.06           | 6.49               | 1.24E-02 | 1.01E-01  | 0.04           | 4.16               | 4.39E-02 | 3.59E-01  | 0.06           | 6.28               | 1.38E-02 | 4.21E-02* | 0.06           | 7.09               | 9.00E-03 | 6.30E-02  | 0.02           | 2.17               | 1.44E-01 | 3.71E-01  |           |
| -19            | -557     | A   | C          |   | 0.470                 | 0.00           | 0.07               | 7.92E-01 | 9.70E-01  | 0.00           | 0.41               | 5.23E-01 | 8.54E-01  | 0.11           | 13.34              | 4.10E-04 | 2.01E-03* | 0.00           | 0.27               | 6.04E-01 | 8.46E-01  | 0.01           | 0.99               | 3.23E-01 | 5.46E-01  |           |
| -18            | -426     | T   | C          |   | 0.887                 | 0.02           | 2.19               | 1.42E-01 | 4.98E-01  | 0.02           | 2.05               | 1.45E-01 | 6.36E-01  | 0.02           | 1.97               | 1.64E-01 | 2.51E-01  | 0.01           | 1.20               | 2.76E-01 | 6.15E-01  | 0.01           | 1.33               | 2.51E-01 | 5.13E-01  |           |
| -17            | -396     | C   | C          |   | 0.419                 | 0.10           | 11.11              | 1.19E-03 | 1.95E-02* | 0.06           | 6.86               | 1.01E-02 | 1.65E-01  | 0.15           | 18.04              | 4.75E-05 | 3.33E-04* | 0.10           | 10.92              | 1.31E-03 | 1.28E-02* | 0.02           | 2.07               | 1.53E-01 | 3.76E-01  |           |
| -16            | -392     | C   | A          |   | 0.082                 | 0.02           | 1.60               | 2.09E-01 | 5.69E-01  | 0.01           | 0.79               | 3.77E-01 | 7.11E-01  | 0.16           | 19.80              | 2.18E-05 | 1.78E-04* | 0.00           | 0.04               | 8.36E-01 | 9.53E-01  | 0.11           | 12.25              | 6.88E-04 | 3.75E-03* |           |
| -15            | -385     | T   | A          |   | 0.076                 | 0.00           | 0.13               | 7.16E-01 | 9.74E-01  | 0.00           | 0.00               | 9.82E-01 | 1.12E+00  | 0.16           | 20.32              | 1.74E-05 | 2.13E-04* | 0.00           | 0.05               | 8.26E-01 | 9.64E-01  | 0.06           | 6.11               | 1.51E-02 | 5.67E-02  |           |
| -14            | -358     | G   | T          |   | 0.127                 | 0.00           | 0.08               | 7.76E-01 | 9.75E-01  | 0.00           | 0.04               | 8.50E-01 | 1.10E+00  | 0.03           | 3.34               | 7.07E-02 | 1.51E-01  | 0.01           | 0.73               | 3.93E-01 | 6.42E-01  | 0.00           | 0.00               | 9.82E-01 | 1.00E+00  |           |
| -13            | -312     | A   | G          |   | 0.182                 | 0.02           | 1.71               | 1.95E-01 | 5.61E-01  | 0.01           | 0.72               | 3.98E-01 | 7.23E-01  | 0.27           | 38.40              | 1.20E-08 | 5.89E-07* | 0.00           | 0.23               | 6.32E-01 | 8.15E-01  | 0.06           | 6.10               | 1.52E-02 | 5.32E-02  |           |
| -12            | -310     | A   | G          |   | 0.274                 | 0.03           | 2.85               | 9.46E-02 | 4.63E-01  | 0.01           | 1.56               | 2.14E-01 | 6.17E-01  | 0.12           | 14.33              | 2.58E-04 | 1.40E-03* | 0.04           | 4.67               | 3.31E-02 | 2.03E-01  | 0.07           | 7.99               | 5.65E-03 | 2.31E-02* |           |
| -11            | -216     | G   | A          |   | 0.000                 | 0.00           | 0.02               | 8.79E-01 | 1.00E+00  | 0.00           | 0.22               | 6.38E-01 | 9.20E-01  | 0.25           | 24.76              | 3.94E-06 | 6.43E-05* | 0.02           | 1.52               | 2.22E-01 | 5.18E-01  | 0.02           | 1.44               | 2.34E-01 | 4.98E-01  |           |
| -10            | -191     | T   | C          |   | 0.000                 | 0.02           | 1.81               | 1.83E-01 | 5.97E-01  | 0.02           | 1.87               | 1.75E-01 | 6.13E-01  | 0.03           | 2.08               | 1.53E-01 | 2.50E-01  | 0.03           | 2.20               | 1.42E-01 | 4.35E-01  | 0.00           | 0.03               | 8.54E-01 | 1.00E+00  |           |
| -9             | -175     | A   | T          |   | 0.505                 | 0.07           | 5.53               | 2.12E-02 | 1.49E-01  | 0.05           | 3.85               | 5.33E-02 | 3.73E-01  | 0.07           | 5.80               | 1.84E-02 | 5.01E-02  | 0.18           | 16.15              | 1.37E-04 | 2.24E-03* | 0.00           | 0.00               | 9.82E-01 | 1.00E+00  |           |
| -8             | -158     | G   | C          |   | 0.171                 | 0.06           | 7.07               | 9.09E-03 | 8.90E-02  | 0.06           | 6.04               | 1.57E-02 | 1.92E-01  | 0.14           | 16.91              | 7.89E-05 | 4.83E-04* | 0.03           | 2.68               | 1.04E-01 | 5.10E-01  | 0.45           | 84.36              | 4.79E-15 | 1.17E-13* |           |
| -7             | -144     | G   | C          |   | 0.310                 | 0.00           | 0.37               | 5.46E-01 | 8.36E-01  | 0.00           | 0.43               | 5.15E-01 | 8.70E-01  | 0.02           | 2.25               | 1.37E-01 | 2.31E-01  | 0.01           | 1.17               | 2.82E-01 | 6.01E-01  | 0.14           | 17.05              | 7.43E-05 | 6.07E-04* |           |
| -6             | -143     | T   | C          |   | 0.155                 | 0.03           | 3.24               | 7.50E-02 | 4.59E-01  | 0.02           | 2.03               | 1.57E-01 | 5.91E-01  | 0.23           | 30.52              | 2.50E-07 | 6.12E-06* | 0.01           | 0.69               | 4.07E-01 | 6.43E-01  | 0.03           | 3.18               | 7.74E-02 | 2.37E-01  |           |
| -5             | -139     | G   | C          |   | 0.429                 | 0.01           | 1.19               | 2.77E-01 | 6.80E-01  | 0.00           | 0.48               | 4.90E-01 | 8.57E-01  | 0.04           | 4.43               | 3.78E-02 | 9.25E-02  | 0.28           | 39.87              | 6.97E-09 | 3.42E-07* | 0.00           | 0.18               | 6.71E-01 | 9.39E-01  |           |
| -4             | -128     | T   | C          |   | 0.151                 | 0.00           | 0.00               | 9.44E-01 | 1.00E+00  | 0.00           | 0.00               | 9.62E-01 | 1.12E+00  | 0.02           | 2.42               | 1.23E-01 | 2.24E-01  | 0.03           | 2.66               | 1.06E-01 | 4.72E-01  | 0.28           | 40.56              | 5.40E-09 | 8.82E-08* |           |
| -3             | -98      | C   | T          |   | 0.217                 | 0.02           | 2.59               | 1.11E-01 | 4.52E-01  | 0.03           | 2.69               | 1.04E-01 | 5.11E-01  | 0.01           | 1.56               | 2.15E-01 | 3.19E-01  | 0.02           | 1.89               | 1.73E-01 | 4.24E-01  | 0.01           | 1.25               | 2.67E-01 | 5.23E-01  |           |
| -2             | -46      | A   | C          |   | 0.000                 | 0.03           | 2.80               | 9.74E-02 | 4.34E-01  | 0.03           | 2.98               | 8.74E-02 | 4.76E-01  | 0.04           | 3.92               | 5.03E-02 | 1.12E-01  | 0.02           | 2.45               | 1.21E-01 | 4.56E-01  | 0.01           | 1.13               | 2.90E-01 | 5.08E-01  |           |
| -1             | -22      | G   | A          |   | 0.000                 | 0.03           | 2.89               | 9.22E-02 | 5.02E-01  | 0.03           | 3.03               | 8.46E-02 | 5.18E-01  | 0.03           | 2.79               | 9.81E-02 | 1.92E-01  | 0.02           | 2.34               | 1.29E-01 | 4.52E-01  | 0.01           | 1.20               | 2.75E-01 | 4.99E-01  |           |
| 1              | 24       | C   | T          | N | NA                    | NA             | NA                 | NA       | NA        | NA             | NA                 | NA       | NA        | NA             | NA                 | NA       | NA        | NA             | NA                 | NA       | NA        | 0.00           | NA                 | NA       | NA        |           |
| 2              | 54       | A   | G          | R | NA                    | NA             | NA                 | NA       | NA        | NA             | NA                 | NA       | NA        | NA             | NA                 | NA       | NA        | NA             | NA                 | NA       | NA        | 0.00           | NA                 | NA       | NA        |           |
| 3              | 66       | T   | C          | N | 0.112                 | 0.02           | 2.37               | 1.27E-01 | 4.78E-01  | 0.02           | 1.68               | 1.98E-01 | 6.07E-01  | 0.00           | 0.02               | 9.02E-01 | 1.00E+00  | 0.00           | 0.32               | 5.73E-01 | 8.26E-01  | 0.09           | 9.90               | 2.17E-03 | 9.64E-03* |           |
| 4              | 90       | G   | A          | Q | 0.000                 | 0.00           | 0.17               | 6.82E-01 | 9.83E-01  | 0.00           | 0.39               | 5.32E-01 | 8.40E-01  | 0.02           | 2.06               | 1.54E-01 | 2.43E-01  | 0.00           | 0.33               | 5.65E-01 | 8.39E-01  | 0.01           | 1.24               | 2.68E-01 | 5.05E-01  |           |
| 5              | 111      | T   | C          | S | 0.249                 | 0.00           | 0.42               | 5.20E-01 | 8.22E-01  | 0.00           | 0.21               | 6.47E-01 | 9.06E-01  | 0.00           | 0.30               | 5.85E-01 | 7.17E-01  | 0.00           | 0.25               | 6.20E-01 | 8.21E-01  | 0.12           | 14.39              | 2.51E-04 | 1.54E-03* |           |
| 6              | 117      | C   | G/T        | G | 0.000                 | 0.01           | 0.65               | 4.22E-01 | 8.27E-01  | 0.01           | 1.17               | 2.82E-01 | 6.59E-01  | 0.07           | 7.64               | 6.76E-03 | 2.37E-02* | 0.01           | 0.79               | 3.75E-01 | 6.56E-01  | 0.00           | 0.05               | 8.23E-01 | 1.00E+00  |           |
| 7              | 126      | A   | G          | G | 0.078                 | 0.19           | 24.39              | 3.05E-06 | 1.50E-04* | 0.18           | 23.37              | 4.69E-06 | 2.30E-04* | 0.06           | 6.72               | 1.10E-02 | 3.58E-02* | 0.02           | 2.25               | 1.37E-01 | 4.48E-01  | 0.59           | 148.10             | 2.20E-16 | 1.08E-14* |           |
| 8              | 145      | T   | C          | F | 0.000                 | 0.01           | 0.96               | 3.30E-01 | 7.02E-01  | 0.01           | 1.31               | 2.55E-01 | 6.93E-01  | 0.03           | 3.25               | 7.45E-02 | 1.52E-01  | 0.01           | 0.80               | 3.75E-01 | 6.34E-01  | 0.02           | 1.71               | 1.95E-01 | 4.54E-01  |           |
| 9              | 159      | G   | A          | S | 0.216                 | 0.00           | 0.45               | 5.04E-01 | 8.24E-01  | 0.00           | 0.24               | 6.25E-01 | 9.28E-01  | 0.00           | 0.30               | 5.83E-01 | 7.32E-01  | 0.00           | 0.25               | 6.15E-01 | 8.37E-01  | 0.12           | 14.58              | 2.30E-04 | 1.61E-03* |           |
| 10             | 177      | C   | T          | Y | 0.000                 | 0.01           | 0.65               | 4.23E-01 | 7.97E-01  | 0.01           | 1.16               | 2.84E-01 | 6.33E-01  | 0.07           | 7.90               | 5.93E-03 | 2.24E-02* | 0.01           | 0.85               | 3.58E-01 | 6.50E-01  | 0.00           | 0.02               | 8.86E-01 | 1.00E+00  |           |
| 11             | 213      | T   | C          | N | 0.214                 | 0.08           | 8.61               | 4.11E-03 | 5.04E-02  | 0.05           | 4.92               | 2.88E-02 | 2.82E-01  | 0.16           | 20.06              | 1.95E-05 | 1.91E-04* | 0.08           | 8.78               | 3.79E-03 | 3.10E-02* | 0.02           | 2.33               | 1.30E-01 | 3.53E-01  |           |
| 12             | 249      | G   | T          | T | 0.178                 | 0.00           | 0.48               | 4.92E-01 | 8.30E-01  | 0.00           | 0.27               | 6.06E-01 | 9.28E-01  | 0.01           | 0.58               | 4.47E-01 | 5.76E-01  | 0.08           | 8.78               | 5.53E-01 | 8.47E-01  | 0.10           | 12.01              | 7.75E-04 | 3.80E-03* |           |
| 13             | 256      | G   | A          | A | T*                    | NA             | NA                 | NA       | NA        | 0.00           | NA                 | NA       | NA        |           |
| 14             | 291      | G   | A/C        | D | NH*                   | 0.000          | 0.00               | 0.12     | 7.28E-01  | 9.65E-01       | 0.00               | 0.02     | 8.96E-01  | 1.13E+00       | 0.02               | 2.47     | 1.19E-01  | 2.24E-01       | 0.00               | 2.62     | 1.09E-01  | 4.45E-01       | 0.00               | 0.08     | 7.79E-01  | 1.00E+00  |
| 15             | 348      | C   | T          | D | D                     | NA             | NA                 | NA       | NA        | 0.00           | NA                 | NA       | NA        |           |
| 16             | 375      | C   | A          | I | I                     | 0.123          | 0.00               | 0.11     | 7.40E-01  | 9.54E-01       | 0.00               | 0.17     | 6.77E-01  | 9.22E-01       | 0.01               | 0.89     | 3.47E-01  | 5.00E-01       | 0.00               | NA       | NA        | NA             | 0.15               | 18.03    | 4.77E-05  | 4.67E-04* |
| 17             | 517      | C   | T/G/A      | L | L                     | 0.032          | 0.01               | 1.11     | 2.94E-01  | 6.56E-01       | 0.01               | 0.96     | 3.30E-01  | 7.03E-01       | 0.01               | 0.71     | 4.00E-01  | 5.30E-01       | 0.01               | 0.99     | 1.67E-01  | 4.31E-01       | 0.26               | 31.00    | 2.70E-07  | 3.30E-06* |
| 18             | 555      | G   | A          | S | S                     | NA             | NA                 | NA       | NA        | 0.00           | NA                 | NA       | NA        |           |
| 19             | 570      | C   | T          | H | H                     | 0.232          | 0.12               | 13.88    | 3.19E-04  | 7.81E-03*      | 0.09               | 10.16    | 1.90E-03  | 4.66E-02*      | 0.11               | 13.00    | 4.82E-04  | 2.15E-03*      | 0.27               | 37.98    | 1.40E-08  | 3.43E-07*      | 0.02               | 2.35     | 1.28E-01  | 3.70E-01  |
| 2              |          |     |            |   |                       |                |                    |          |           |                |                    |          |           |                |                    |          |           |                |                    |          |           |                |                    |          |           |           |



**Table S7.** Statistical output for linear models relating pairwise distances of allele frequencies to pairwise difference in environmental proxies (geographical distance, latitude, longitude, altitude and pCPP) in Eastern Europe. SNP loc.: location of SNP relative to intron 8 – exon 9 boundary. SNP: changed nucleotides. Amino acid: changed amino acids are indicated with an asterisk.  $F_{ST}$ : F-statistic reflecting overall degree of genetic differentiation. pCPP: predicted critical photoperiod.  $p$ .adj: Benjamini-Hochberg adjusted p-value. Significant correlations are marked with an asterisk ( $p < 0.05$ ).

| EASTERN EUROPE |          |     |       |            | geographical distance |                |                    |          |           | latitude       |                    |          |           | longitude      |                    |          |          | altitude       |                    |          |           | pCPP           |                    |          |           |
|----------------|----------|-----|-------|------------|-----------------------|----------------|--------------------|----------|-----------|----------------|--------------------|----------|-----------|----------------|--------------------|----------|----------|----------------|--------------------|----------|-----------|----------------|--------------------|----------|-----------|
| #              | SNP loc. | SNP |       | amino acid | F <sub>ST</sub>       | R <sup>2</sup> | F <sub>1,375</sub> | p        | p-adj     | R <sup>2</sup> | F <sub>1,375</sub> | p        | p-adj     | R <sup>2</sup> | F <sub>1,375</sub> | p        | p-adj    | R <sup>2</sup> | F <sub>1,375</sub> | p        | p-adj     | R <sup>2</sup> | F <sub>1,375</sub> | p        | p-adj     |
| -22            | -816     | A   | G     |            | NA                    | NA             | NA                 | NA       | NA        | NA             | NA                 | NA       | NA        | NA             | NA                 | NA       | NA       | NA             | NA                 | NA       | NA        | 0.00           | NA                 | NA       | NA        |
| -21            | -764     | C   | T     |            | 0.241                 | 0.04           | 10.29              | 1.53E-03 | 2.50E-02* | 0.06           | 14.82              | 1.53E-04 | 1.50E-03* | 0.04           | 8.43               | 4.05E-03 | 3.31E-02 | 0.02           | 5.77               | 1.71E-02 | 1.67E-01  | 0.04           | 9.25               | 2.63E-03 | 1.61E-04* |
| -20            | -630     | C   | A/T   |            | NA                    | NA             | NA                 | NA       | NA        | NA             | NA                 | NA       | NA        | NA             | NA                 | NA       | NA       | NA             | NA                 | NA       | NA        | 0.00           | NA                 | NA       | NA        |
| -19            | -557     | A   | C     |            | NA                    | NA             | NA                 | NA       | NA        | NA             | NA                 | NA       | NA        | NA             | NA                 | NA       | NA       | NA             | NA                 | NA       | NA        | 0.00           | NA                 | NA       | NA        |
| -18            | -426     | T   | C     |            | NA                    | NA             | NA                 | NA       | NA        | NA             | NA                 | NA       | NA        | NA             | NA                 | NA       | NA       | NA             | NA                 | NA       | NA        | 0.00           | NA                 | NA       | NA        |
| -17            | -396     | C   | A     |            | NA                    | NA             | NA                 | NA       | NA        | NA             | NA                 | NA       | NA        | NA             | NA                 | NA       | NA       | NA             | NA                 | NA       | NA        | 0.00           | NA                 | NA       | NA        |
| -16            | -392     | C   | A     |            | 0.119                 | 0.00           | 0.12               | 7.27E-01 | 1.00E+00  | 0.01           | 2.91               | 8.90E-02 | 2.42E-01  | 0.00           | 0.32               | 5.73E-01 | 9.06E-01 | 0.00           | 1.39               | 2.39E-01 | 4.68E-01  | 0.01           | 2.20               | 1.39E-01 | 3.69E-02* |
| -15            | -385     | T   | A     |            | 0.682                 | 0.01           | 2.44               | 1.19E-01 | 3.44E-01  | 0.09           | 39.04              | 1.13E-09 | 2.77E-08* | 0.02           | 6.04               | 1.44E-02 | 6.43E-02 | 0.01           | 4.57               | 3.31E-02 | 1.47E-01  | 0.00           | 1.81               | 1.79E-01 | 5.84E-02  |
| -14            | -358     | G   | T     |            | 0.769                 | 0.04           | 15.76              | 8.64E-05 | 2.12E-03* | 0.04           | 13.73              | 2.43E-04 | 1.99E-03* | 0.02           | 7.27               | 7.32E-03 | 4.45E-02 | 0.02           | 7.21               | 7.57E-03 | 9.27E-02  | 0.05           | 17.70              | 3.25E-05 | 1.32E-06* |
| -13            | -312     | A   | G     |            | 0.160                 | 0.01           | 1.95               | 1.63E-01 | 4.21E-01  | 0.08           | 33.09              | 1.83E-08 | 2.98E-07* | 0.01           | 5.46               | 2.00E-02 | 6.54E-02 | 0.01           | 3.70               | 5.52E-02 | 1.93E-01  | 0.00           | 1.83               | 1.77E-01 | 5.06E-02  |
| -12            | -310     | A   | G     |            | 0.673                 | 0.00           | 0.06               | 8.14E-01 | 1.00E+00  | 0.00           | 0.19               | 6.61E-01 | 1.00E+00  | 0.00           | 0.46               | 4.99E-01 | 8.73E-01 | 0.00           | 0.11               | 7.38E-01 | 1.00E+00  | 0.00           | 0.56               | 4.55E-01 | 2.32E-01  |
| -11            | -216     | G   | A     |            | 0.206                 | 0.00           | 1.02               | 3.14E-01 | 6.40E-01  | 0.00           | 1.84               | 1.76E-01 | 4.31E-01  | 0.00           | 0.31               | 5.76E-01 | 8.82E-01 | 0.00           | 0.00               | 9.74E-01 | 1.00E+00  | 0.01           | 3.14               | 7.71E-02 | 1.26E-02* |
| -10            | -191     | T   | C     |            | 0.691                 | 0.01           | 2.25               | 1.35E-01 | 3.67E-01  | 0.00           | 0.29               | 5.89E-01 | 1.00E+00  | 0.02           | 7.29               | 7.27E-03 | 4.45E-02 | 0.01           | 5.54               | 1.91E-02 | 1.56E-01  | 0.01           | 3.93               | 4.82E-02 | 4.92E-03* |
| -9             | -175     | A   | T     |            | 0.211                 | 0.01           | 3.99               | 4.66E-02 | 1.76E-01  | 0.00           | 0.97               | 3.24E-01 | 7.56E-01  | 0.02           | 5.96               | 1.51E-02 | 5.69E-02 | 0.01           | 5.33               | 2.15E-02 | 1.31E-01  | 0.00           | 1.73               | 1.90E-01 | 6.96E-02  |
| -8             | -158     | G   | C     |            | 0.767                 | 0.01           | 3.74               | 5.37E-02 | 1.65E-01  | 0.10           | 43.16              | 1.69E-10 | 8.27E-09* | 0.01           | 4.39               | 3.68E-02 | 1.00E-01 | 0.12           | 49.37              | 1.00E-11 | 4.91E-10* | 0.01           | 2.88               | 9.04E-02 | 1.66E-02* |
| -7             | -144     | G   | C     |            | 0.166                 | 0.02           | 8.27               | 4.26E-03 | 3.48E-02* | 0.02           | 6.97               | 8.66E-03 | 3.86E-02* | 0.01           | 5.45               | 2.01E-02 | 5.81E-02 | 0.07           | 26.95              | 3.43E-07 | 8.41E-06* | 0.01           | 4.32               | 3.85E-02 | 4.92E-03* |
| -6             | -143     | T   | C     |            | 0.197                 | 0.00           | 0.15               | 6.96E-01 | 1.00E+00  | 0.02           | 7.60               | 6.14E-03 | 3.01E-02* | 0.01           | 2.30               | 1.30E-01 | 2.90E-01 | 0.01           | 3.09               | 7.94E-02 | 1.95E-01  | 0.00           | 0.22               | 6.37E-01 | 3.64E-01  |
| -5             | -139     | G   | C     |            | NA                    | NA             | NA                 | NA       | NA        | NA             | NA                 | NA       | NA        | NA             | NA                 | NA       | NA       | NA             | NA                 | NA       | NA        | 0.00           | NA                 | NA       | NA        |
| -4             | -128     | T   | C     |            | 0.235                 | 0.00           | 0.03               | 8.62E-01 | 1.00E+00  | 0.01           | 5.33               | 2.16E-02 | 8.12E-02  | 0.01           | 2.54               | 1.12E-01 | 2.61E-01 | 0.01           | 4.44               | 3.58E-02 | 1.46E-01  | 0.00           | 1.57               | 2.11E-01 | 8.19E-02  |
| -3             | -98      | C   | T     |            | NA                    | NA             | NA                 | NA       | NA        | NA             | NA                 | NA       | NA        | NA             | NA                 | NA       | NA       | NA             | NA                 | NA       | NA        | 0.00           | NA                 | NA       | NA        |
| -2             | -46      | A   | C     |            | 0.033                 | 0.01           | 3.78               | 5.26E-02 | 1.72E-01  | 0.01           | 3.19               | 7.48E-02 | 2.16E-01  | 0.01           | 2.17               | 1.41E-01 | 2.77E-01 | 0.01           | 4.94               | 2.68E-02 | 1.31E-01  | 0.01           | 2.40               | 1.22E-01 | 2.75E-02* |
| -1             | -22      | G   | A     |            | NA                    | NA             | NA                 | NA       | NA        | NA             | NA                 | NA       | NA        | NA             | NA                 | NA       | NA       | NA             | NA                 | NA       | NA        | 0.00           | NA                 | NA       | NA        |
| 1              | 24       | C   | T     | N          | 0.022                 | 0.00           | 0.05               | 8.17E-01 | 1.00E+00  | 0.00           | 0.78               | 3.78E-01 | 8.43E-01  | 0.00           | 0.05               | 8.21E-01 | 1.00E+00 | 0.01           | 3.43               | 6.47E-02 | 1.98E-01  | 0.00           | 0.00               | 9.74E-01 | 6.56E-01  |
| 2              | 54       | A   | G     | R          | 0.046                 | 0.00           | 0.05               | 8.17E-01 | 1.00E+00  | 0.00           | 0.78               | 3.78E-01 | 8.06E-01  | 0.00           | 0.05               | 8.21E-01 | 1.00E+00 | 0.01           | 3.43               | 6.47E-02 | 1.86E-01  | 0.00           | 0.00               | 9.74E-01 | 6.76E-01  |
| 3              | 66       | T   | C     | N          | 0.169                 | 0.01           | 5.22               | 2.29E-02 | 1.40E-01  | 0.00           | 0.28               | 6.00E-01 | 1.00E+00  | 0.02           | 9.32               | 2.42E-03 | 2.97E-02 | 0.01           | 5.19               | 2.33E-02 | 1.27E-01  | 0.01           | 2.87               | 9.12E-02 | 1.86E-02* |
| 4              | 90       | G   | A     | Q          | NA                    | NA             | NA                 | NA       | NA        | NA             | NA                 | NA       | NA        | NA             | NA                 | NA       | NA       | NA             | NA                 | NA       | NA        | 0.00           | NA                 | NA       | NA        |
| 5              | 111      | T   | C     | S          | 0.216                 | 0.00           | 1.59               | 2.08E-01 | 4.86E-01  | 0.00           | 0.13               | 7.19E-01 | 1.00E+00  | 0.01           | 3.76               | 5.31E-02 | 1.30E-01 | 0.00           | 1.47               | 2.26E-01 | 4.82E-01  | 0.01           | 2.22               | 1.37E-01 | 3.35E-02* |
| 6              | 117      | C   | G/T   | G          | 0.047                 | 0.00           | 0.11               | 7.38E-01 | 1.00E+00  | 0.00           | 0.09               | 7.65E-01 | 1.00E+00  | 0.00           | 0.32               | 5.71E-01 | 9.32E-01 | 0.00           | 0.13               | 7.23E-01 | 1.00E+00  | 0.00           | 1.79               | 1.82E-01 | 6.32E-02  |
| 7              | 126      | A   | G     | G          | 0.751                 | 0.00           | 0.00               | 9.88E-01 | 1.00E+00  | 0.03           | 10.91              | 1.05E-03 | 6.43E-03* | 0.02           | 6.03               | 1.45E-02 | 5.91E-02 | 0.00           | 0.80               | 3.73E-01 | 6.52E-01  | 0.00           | 0.05               | 8.26E-01 | 5.22E-01  |
| 8              | 145      | T   | C     | F          | 0.712                 | 0.02           | 7.55               | 6.28E-03 | 4.39E-02* | 0.01           | 2.06               | 1.52E-01 | 3.92E-01  | 0.02           | 7.73               | 5.72E-03 | 4.00E-02 | 0.01           | 2.90               | 8.97E-02 | 2.09E-01  | 0.00           | 0.13               | 7.17E-01 | 4.24E-01  |
| 9              | 159      | G   | A     | S          | 0.535                 | 0.01           | 4.46               | 3.53E-02 | 1.57E-01  | 0.00           | 0.09               | 7.61E-01 | 1.00E+00  | 0.02           | 8.70               | 3.39E-03 | 3.32E-02 | 0.00           | 0.00               | 9.83E-01 | 1.00E+00  | 0.00           | 0.49               | 4.84E-01 | 2.57E-01  |
| 10             | 177      | C   | T     | Y          | 0.186                 | 0.00           | 1.25               | 2.64E-01 | 5.87E-01  | 0.00           | 0.27               | 6.02E-01 | 1.00E+00  | 0.00           | 0.86               | 3.54E-01 | 6.67E-01 | 0.00           | 0.55               | 4.59E-01 | 7.76E-01  | 0.00           | 0.04               | 8.50E-01 | 5.55E-01  |
| 11             | 213      | T   | C     | N          | NA                    | NA             | NA                 | NA       | NA        | NA             | NA                 | NA       | NA        | NA             | NA                 | NA       | NA       | NA             | NA                 | NA       | NA        | 0.00           | NA                 | NA       | NA        |
| 12             | 249      | G   | T     | T          | 0.211                 | 0.00           | 0.73               | 3.93E-01 | 7.71E-01  | 0.00           | 0.35               | 5.55E-01 | 1.00E+00  | 0.01           | 4.32               | 3.83E-02 | 9.87E-02 | 0.00           | 1.28               | 2.58E-01 | 4.87E-01  | 0.00           | 1.24               | 2.66E-01 | 1.25E-01  |
| 13             | 256      | G   | A     | A          | 0.951                 | 0.01           | 3.82               | 5.13E-02 | 1.80E-01  | 0.00           | 0.77               | 3.81E-01 | 7.78E-01  | 0.02           | 6.07               | 1.42E-02 | 6.97E-02 | 0.00           | 1.75               | 1.87E-01 | 4.17E-01  | 0.00           | 0.65               | 4.19E-01 | 2.05E-01  |
| 14             | 291      | G   | A/C   | D          | NH*                   | NA             | NA                 | NA       | NA        | NA             | NA                 | NA       | NA        | NA             | NA                 | NA       | NA       | NA             | NA                 | NA       | NA        | 0.00           | NA                 | NA       | NA        |
| 15             | 348      | C   | T     | D          | 0.213                 | 0.00           | 0.61               | 4.36E-01 | 8.22E-01  | 0.01           | 4.18               | 4.15E-02 | 1.36E-01  | 0.00           | 0.36               | 5.52E-01 | 9.32E-01 | 0.02           | 7.46               | 6.59E-03 | 1.08E-01  | 0.00           | 1.25               | 2.64E-01 | 1.19E-01  |
| 16             | 375      | C   | A     | I          | 0.265                 | 0.01           | 5.06               | 2.51E-02 | 1.23E-01  | 0.00           | 0.22               | 6.40E-01 | 1.00E+00  | 0.02           | 9.46               | 2.26E-03 | 3.69E-02 | 0.00           | 0.13               | 7.24E-01 | 1.00E+00  | 0.00           | 1.41               | 2.36E-01 | 9.61E-02  |
| 17             | 517      | C   | T/G/A | L          | NA                    | NA             | NA                 | NA       | NA        | NA             | NA                 | NA       | NA        | NA             | NA                 | NA       | NA       | NA             | NA                 | NA       | NA        | 0.00           | NA                 | NA       | NA        |
| 18             | 555      | G   | A     | S          | 0.193                 | 0.02           | 8.48               | 3.82E-03 | 3.74E-02* | 0.01           | 3.61               | 5.84E-02 | 1.79E-01  | 0.01           | 5.60               | 1.85E-02 | 6.46E-02 | 0.00           | 1.43               | 2.32E-01 | 4.74E-01  | 0.00           | 0.42               | 5.16E-01 | 2.84E-01  |
| 19             | 570      | C   | T     | H          | NA                    | NA             | NA                 | NA       | NA        | NA             | NA                 | NA       | NA        | NA             | NA                 | NA       | NA       | NA             | NA                 | NA       | NA        | 0.00           | NA                 | NA       | NA        |
| 20             | 621      | C   | T     | T          | 0.092                 | 0.01           | 1.95               | 1.63E-01 | 4.00E-01  | 0.08           | 33.09              | 1.83E-08 | 2.24E-07* | 0.01           | 5.46               | 2.00E-02 | 6.13E-02 | 0.01           | 3.70               | 5.52E-02 | 1.80E-01  | 0.00           | 1.83               | 1.77E-01 | 5.42E-02  |
| 21             | 729      | C   | T     | H          | 0.150                 | 0.11           | 46.26              | 4.10E-11 | 2.01E-09* | 0.02           | 6.96               | 8.71E-03 | 3.55E-02* | 0.14           | 60.95              | 5.92E-14 | 2.90E-12 | 0.01           | 3.99               | 4.66E-02 | 1.75E-01  | 0.11           | 44.46              | 9.33E-11 | 1.90E-12* |
| 22             | 731      | *C  | T     | A          | V*                    | NA             | NA                 | NA       | NA        | NA             | NA                 | NA       | NA        | NA             | NA                 | NA       | NA       | NA             | NA                 | NA       | NA        | 0.00           | NA                 | NA       | NA        |
| 23             | 747      | T   | G     | A          | 0.676                 | 0.00           | 1.08               | 3.00E-01 | 6.40E-01  | 0.00           | 0.03               | 8.58E-01 | 1.00E+00  | 0.01           | 2.29               | 1.31E-01 | 2.78E-01 | 0.00           | 1.07               | 3.01E-01 | 5.47E-01  | 0.00           | 0.07               | 7.92E-01 | 4.85E-01  |
